# Supplementary material for: The analysis of cathepsin L that mediates cellular SARS‐CoV‐2 infection leading to COVID‐19 in head and neck squamous cell carcinoma
Source: PubMed Central journal article supplement (PMC10246451; doi:10.3389/fimmu.2023.1156038), 2023-05-23

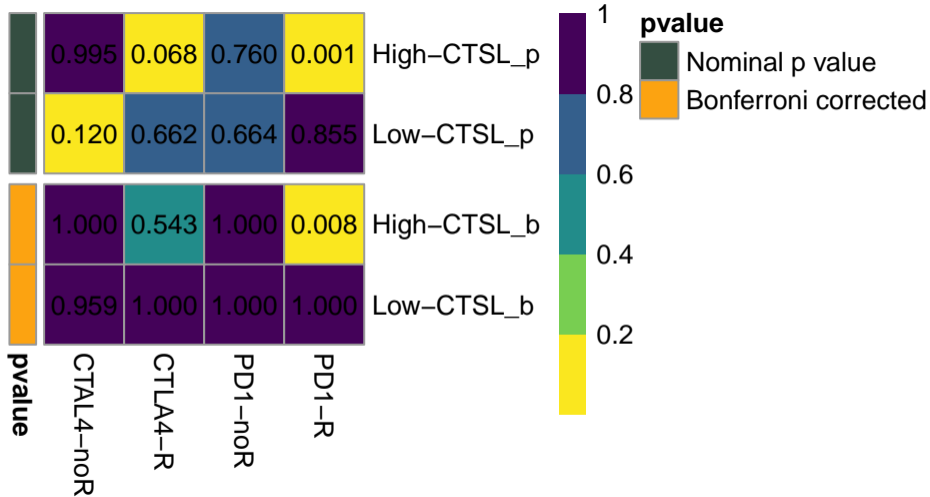

Supplement: DataSheet_1.pdf [file DataSheet_1.pdf]
